# Supplementary material for: Short cracks in knee meniscus tissue cause strain concentrations, but do not reduce ultimate stress, in single-cycle uniaxial tension
Source: R Soc Open Sci. 2018 Nov 14;5(11):181166. doi: 10.1098/rsos.181166 (PMC6281910; doi:10.1098/rsos.181166)
Supplement: DIC strain field statistics; near-tip vs. away-from tip [file rsos181166supp4.csv]

../Table S3 - DIC strain stats.csv
