# Supplementary material for: Short cracks in knee meniscus tissue cause strain concentrations, but do not reduce ultimate stress, in single-cycle uniaxial tension
Source: R Soc Open Sci. 2018 Nov 14;5(11):181166. doi: 10.1098/rsos.181166 (PMC6281910; doi:10.1098/rsos.181166)
Supplement: Stress–strain curve statistics for radial tension midsubstance failures [file rsos181166supp3.csv]

../Table S2 - stress–strain stats - radial midsubstance failures only.csv
